# Supplementary material for: Mutational Signature 3 Detected from Clinical Panel Sequencing is Associated with Responses to Olaparib in Breast and Ovarian Cancers
Source: Oxford University Press journal article supplement (doi:10.1158/1078-0432.ccr-22-0749), 2022-09-01
Supplement: ccr-22-0749_supplementary_table_2_suppts2.xlsx [file ccr-22-0749_supplementary_table_2_suppts2.xlsx]

## Sheet: Sheet1
difference alteration frequency	pval	gene	CN alteration type	Pathways	entrez
-0.583333	0.0174049	PLA2G12A	loss	Acyl chain remodelling of PS:Glycerophospholipid biosynthesis:Metabolism of lipids:Synthesis of PA:Phospholipid metabolism	81579
-0.583333	0.0174049	GAR1	loss	Telomere Maintenance:Extension of Telomeres:Chromosome Maintenance:Telomere Extension By Telomerase:rRNA processing in the nucleus and cytosol:rRNA processing:rRNA modification in the nucleus and cytosol	54433
-0.583333	0.0174049	CCNA2	loss	Telomere Maintenance:Extension of Telomeres:Chromosome Maintenance:Telomere Extension By Telomerase:Cdc20:Phospho-APC/C mediated degradation of Cyclin A:APC:Cdc20 mediated degradation of cell cycle proteins prior to satisfation of the cell cycle checkpoint:APC/C:Cdc20 mediated degradation of mitotic proteins:Activation of APC/C and APC/C:Cdc20 mediated degradation of mitotic proteins:Deubiquitina…	890
-0.583333	0.0174049	CASP6	loss	Programmed Cell Death:Apoptosis:TP53 Regulates Transcription of Cell Death Genes:Apoptotic cleavage of cellular proteins:Apoptotic execution phase	839
-0.583333	0.0174049	CAMK2D	loss	Signaling by BRAF and RAF fusions:MAPK family signaling cascades:RAF/MAP kinase cascade:MAPK1/MAPK3 signaling:FLT3 Signaling:Signaling by RAF1 mutants:Signaling by moderate kinase activity BRAF mutants:Signaling by RAS mutants:Paradoxical activation of RAF signaling by kinase inactive BRAF:Signaling downstream of RAS mutants:Oncogenic MAPK signaling:Transcriptional Regulation by MECP2:Ion homeost…	817
-0.583333	0.0174049	EGF	loss	MAPK family signaling cascades:RAF/MAP kinase cascade:MAPK1/MAPK3 signaling:FLT3 Signaling:Signaling by ERBB4:NOTCH3 Activation and Transmission of Signal to the Nucleus:EGFR downregulation:Signaling by EGFR:Constitutive Signaling by Aberrant PI3K in Cancer:Signaling by NOTCH3:Signaling by PTK6:Signaling by Non-Receptor Tyrosine Kinases:Platelet activation, signaling and aggregation:Platelet degr…	1950
-0.583333	0.0174049	IL2	loss	MAPK family signaling cascades:RAF/MAP kinase cascade:MAPK1/MAPK3 signaling:FLT3 Signaling:Interleukin-3, Interleukin-5 and GM-CSF signaling	3558
-0.583333	0.0174049	FGF2	loss	MAPK family signaling cascades:RAF/MAP kinase cascade:MAPK1/MAPK3 signaling:FLT3 Signaling:FRS-mediated FGFR1 signaling:Downstream signaling of activated FGFR4:Signaling by FGFR4:Negative regulation of FGFR1 signaling:Negative regulation of FGFR4 signaling:FGFR1 mutant receptor activation:Downstream signaling of activated FGFR1:Downstream signaling of activated FGFR3:Signaling by FGFR3:Downstream…	2247
-0.5	0.0436017	NCSTN	gain	Developmental Biology:Neutrophil degranulation:Innate Immune System:EPH-ephrin mediated repulsion of cells:Axon guidance:Nervous system development:Degradation of the extracellular matrix:Extracellular matrix organization:EPH-Ephrin signaling:Cell death signalling via NRAGE, NRIF and NADE:p75 NTR receptor-mediated signalling:Signaling by Receptor Tyrosine Kinases:Signaling by ERBB4:Death Receptor…	23385
-0.5	0.0436017	MPZ	gain	Developmental Biology:Nervous system development	4359
-0.5	0.0436017	ABL2	gain	Developmental Biology:Axon guidance:Nervous system development:Signaling by ROBO receptors	27
-0.5	0.0436017	CACNB4	gain	Developmental Biology:Neuronal System:Axon guidance:Nervous system development:Transmission across Chemical Synapses:NCAM signaling for neurite out-growth:NCAM1 interactions	785
-0.583333	0.0174049	TBL1XR1	gain	Developmental Biology:Organelle biogenesis and maintenance:Circadian Clock:Infectious disease:Activation of gene expression by SREBF (SREBP):Regulation of cholesterol biosynthesis by SREBP (SREBF):Chromatin modifying enzymes:Chromatin organization:Signaling by Nuclear Receptors:Mitochondrial biogenesis:Metabolism of lipids:Diseases of signal transduction by growth factor receptors and second mess…	79718
-0.583333	0.0174049	PIK3CA	gain	Developmental Biology:Signaling by PDGFR in disease:Cell-Cell communication:Cell surface interactions at the vascular wall:Innate Immune System:Tie2 Signaling:Insulin receptor signalling cascade:Signaling by PDGF:Axon guidance:RET signaling:Signaling by Type 1 Insulin-like Growth Factor 1 Receptor (IGF1R):IGF1R signaling cascade:Signaling by NTRK1 (TRKA):Nervous system development:Downstream sign…	5290
-0.583333	0.0174049	SOX2	gain	Developmental Biology:Deactivation of the beta-catenin transactivating complex:Interleukin-4 and Interleukin-13 signaling:Signaling by WNT:TCF dependent signaling in response to WNT:Transcriptional regulation of pluripotent stem cells:Cytokine Signaling in Immune system	6657
-0.583333	0.0174049	AP2M1	gain	Developmental Biology:EPH-ephrin mediated repulsion of cells:Neuronal System:Plasma lipoprotein assembly, remodeling, and clearance:Axon guidance:Neurotransmitter receptors and postsynaptic signal transmission:Signaling by NTRK1 (TRKA):Nervous system development:Transport of small molecules:Transmission across Chemical Synapses:Signaling by NTRKs:PCP/CE pathway:EPH-Ephrin signaling:Plasma lipopro…	1173
-0.583333	0.0174049	PSMD2	gain	Developmental Biology:Neutrophil degranulation:Innate Immune System:ABC-family proteins mediated transport:Axon guidance:Nervous system development:Transport of small molecules:PCP/CE pathway:UCH proteinases:Stabilization of p53:Hedgehog ligand biogenesis:Signaling by ROBO receptors:Degradation of DVL:Signaling by WNT:Beta-catenin independent WNT signaling:p53-Dependent G1 DNA Damage Response:p53…	5708
-0.583333	0.0174049	EIF4G1	gain	Developmental Biology:Axon guidance:Interferon Signaling:Nervous system development:Deadenylation of mRNA:mTORC1-mediated signalling:Antiviral mechanism by IFN-stimulated genes:ISG15 antiviral mechanism:Nonsense-Mediated Decay (NMD):Nonsense Mediated Decay (NMD) enhanced by the Exon Junction Complex (EJC):MTOR signalling:Signaling by ROBO receptors:Deadenylation-dependent mRNA decay:Nonsense Medi…	1981
-0.583333	0.0174049	POLR2H	gain	Developmental Biology:Innate Immune System:Signaling by FGFR2 in disease:Signaling by FGFR in disease:RNA polymerase II transcribes snRNA genes:Signaling by FGFR2:RNA Polymerase III Transcription:RNA Polymerase III Abortive And Retractive Initiation:Signaling by FGFR:RNA Polymerase III Transcription Initiation:Signaling by Receptor Tyrosine Kinases:RNA Polymerase III Transcription Initiation From…	5437
-0.583333	0.0174049	EPHB3	gain	Developmental Biology:EPH-ephrin mediated repulsion of cells:Axon guidance:Nervous system development:EPH-Ephrin signaling:EPHB-mediated forward signaling	2049
-0.5	0.0436017	F11R	gain	Cell-Cell communication:Cell surface interactions at the vascular wall:Cell-cell junction organization:Cell junction organization:Extracellular matrix organization:Tight junction interactions:Hemostasis:Integrin cell surface interactions:Signaling by TGFB family members:Signaling by TGF-beta Receptor Complex	50848
-0.5	0.0436017	PVRL4	gain	Cell-Cell communication:Cell-cell junction organization:Cell junction organization:Adherens junctions interactions	81607
-0.5	0.0436017	NPHS2	gain	Cell-Cell communication:Nephrin family interactions	7827
-0.5	0.0436017	SLAMF6	gain	Immunoregulatory interactions between a Lymphoid and a non-Lymphoid cell	114836
-0.5	0.0436017	SLAMF7	gain	Immunoregulatory interactions between a Lymphoid and a non-Lymphoid cell	57823
-0.5	0.0436017	FCGR3A	gain	Immunoregulatory interactions between a Lymphoid and a non-Lymphoid cell:Innate Immune System:Role of phospholipids in phagocytosis:Fcgamma receptor (FCGR) dependent phagocytosis:FCGR3A-mediated IL10 synthesis:Regulation of actin dynamics for phagocytic cup formation:Parasite infection:Leishmania phagocytosis:FCGR3A-mediated phagocytosis:Anti-inflammatory response favouring Leishmania parasite in…	2214
-0.5	0.0436017	FCER1G	gain	Neutrophil degranulation:Cell surface interactions at the vascular wall:Innate Immune System:Role of LAT2/NTAL/LAB on calcium mobilization:Hemostasis:FCERI mediated MAPK activation:Platelet activation, signaling and aggregation:Dectin-2 family:Platelet Adhesion to exposed collagen:FCERI mediated Ca+2 mobilization:GPVI-mediated activation cascade:Fc epsilon receptor (FCERI) signaling	2207
-0.5	0.0436017	FCGR2A	gain	Neutrophil degranulation:Innate Immune System:Role of phospholipids in phagocytosis:Fcgamma receptor (FCGR) dependent phagocytosis:FCGR3A-mediated IL10 synthesis:Regulation of actin dynamics for phagocytic cup formation:Anti-inflammatory response favouring Leishmania parasite infection:Leishmania parasite growth and survival:Leishmania infection:Infectious disease	2212
-0.5	0.0436017	HSPA6	gain	Neutrophil degranulation:Innate Immune System	3310
-0.5	0.0436017	FCGR3B	gain	Neutrophil degranulation:Innate Immune System	2215
-0.5	0.0436017	PRDX6	gain	Neutrophil degranulation:Innate Immune System:Detoxification of Reactive Oxygen Species	9588
-0.583333	0.0174049	ATP11B	gain	Neutrophil degranulation:Innate Immune System:Ion transport by P-type ATPases:Transport of small molecules:Ion channel transport	23200
-0.5	0.0436017	CD84	gain	Cell surface interactions at the vascular wall:Hemostasis	8832
-0.5	0.0436017	CD48	gain	Cell surface interactions at the vascular wall:Hemostasis	962
-0.5	0.0436017	CD244	gain	Cell surface interactions at the vascular wall:Hemostasis	51744
-0.5	0.0436017	ITLN1	gain	Innate Immune System:Antimicrobial peptides	55600
-0.5	0.0436017	ATP1A2	gain	Ion transport by P-type ATPases:Transport of small molecules:Cardiac conduction:Muscle contraction:Ion homeostasis:SARS-CoV Infections:Infectious disease:Ion channel transport:Potential therapeutics for SARS	477
-0.5	0.0436017	ATP1A4	gain	Ion transport by P-type ATPases:Transport of small molecules:Cardiac conduction:Muscle contraction:Ion homeostasis:SARS-CoV Infections:Infectious disease:Ion channel transport:Potential therapeutics for SARS	480
-0.5	0.0436017	PEX19	gain	ABC-family proteins mediated transport:Transport of small molecules	5824
-0.583333	0.0174049	ABCC5	gain	ABC-family proteins mediated transport:Transport of small molecules:Glycosaminoglycan metabolism:Metabolism of carbohydrates	10057
-0.5	0.0436017	KCNJ10	gain	Inwardly rectifying K+ channels:Activation of G protein gated Potassium channels:G protein gated Potassium channels:Inhibition of voltage gated Ca2+ channels via Gbeta/gamma subunits:Neuronal System:Potassium Channels:Neurotransmitter receptors and postsynaptic signal transmission:Transmission across Chemical Synapses:GABA B receptor activation:Activation of GABAB receptors:GABA receptor activati…	3766
-0.5	0.0436017	KCNJ9	gain	Inwardly rectifying K+ channels:Activation of G protein gated Potassium channels:G protein gated Potassium channels:Inhibition of voltage gated Ca2+ channels via Gbeta/gamma subunits:Neuronal System:Potassium Channels:Neurotransmitter receptors and postsynaptic signal transmission:Transmission across Chemical Synapses:GABA B receptor activation:Activation of GABAB receptors:GABA receptor activati…	3765
-0.583333	0.0174049	GNB4	gain	Inwardly rectifying K+ channels:Activation of G protein gated Potassium channels:G protein gated Potassium channels:Inhibition of voltage gated Ca2+ channels via Gbeta/gamma subunits:Neuronal System:Potassium Channels:Neurotransmitter receptors and postsynaptic signal transmission:Transport of small molecules:Transmission across Chemical Synapses:G alpha (q) signalling events:GABA B receptor acti…	59345
-0.583333	0.0174049	KCNMB2	gain	Neuronal System:Potassium Channels:Hemostasis	10242
-0.583333	0.0174049	KCNMB3	gain	Neuronal System:Potassium Channels:Hemostasis	27094
-0.583333	0.0174049	HTR3D	gain	Neuronal System:Neurotransmitter receptors and postsynaptic signal transmission:Transmission across Chemical Synapses	200909
-0.583333	0.0174049	HTR3C	gain	Neuronal System:Neurotransmitter receptors and postsynaptic signal transmission:Transmission across Chemical Synapses	170572
-0.583333	0.0174049	HTR3E	gain	Neuronal System:Neurotransmitter receptors and postsynaptic signal transmission:Transmission across Chemical Synapses	285242
-0.583333	0.0174049	B3GNT5	gain	O-linked glycosylation of mucins:O-linked glycosylation	84002
-0.5	0.0436017	APOA2	gain	Plasma lipoprotein assembly, remodeling, and clearance:Transport of small molecules:Regulation of Insulin-like Growth Factor (IGF) transport and uptake by Insulin-like Growth Factor Binding Proteins (IGFBPs):Post-translational protein phosphorylation:G alpha (i) signalling events:Metabolism of vitamins and cofactors:Metabolism of lipids:Metabolism of fat-soluble vitamins	336
-0.5	0.0436017	SOAT1	gain	Plasma lipoprotein assembly, remodeling, and clearance:Transport of small molecules:Plasma lipoprotein clearance	6646
